# Supplementary material
Source: Copernicus journal article supplement (doi:10.5194/egusphere-2026-2786)
Supplement: Supplementary file 1 [file egusphere-2026-2786-supplement.pdf]

## Supplemental Materials

**Figure S1.** Scatter plots comparing aircraft-sampled and domain-averaged cloud water content (CWC) for all horizontal patterns, vertical profiles, and flight speed categories. The x-axis shows domain-mean CWC over sampled layers, and the y-axis shows trajectory-averaged CWC. Colors indicate sampling height (m). The black line denotes the 1:1 reference line, and the blue line shows the linear regression fit.

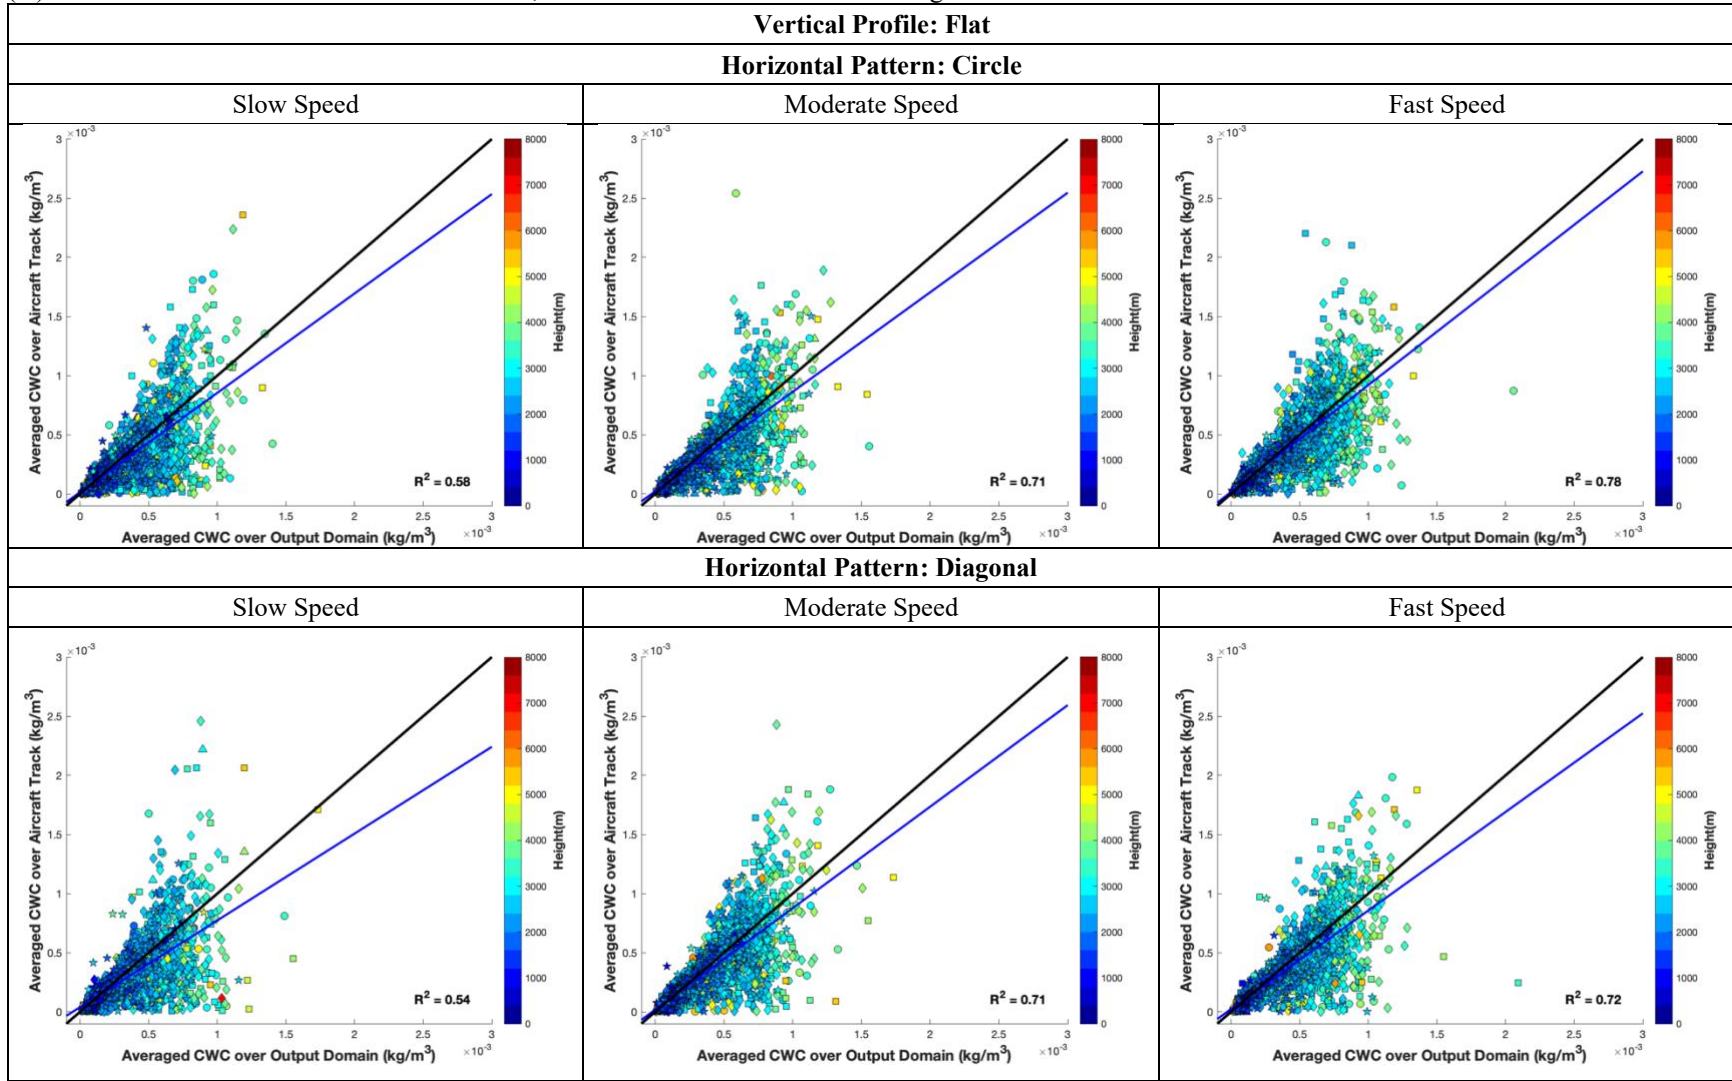

### Horizontal Pattern: Straight

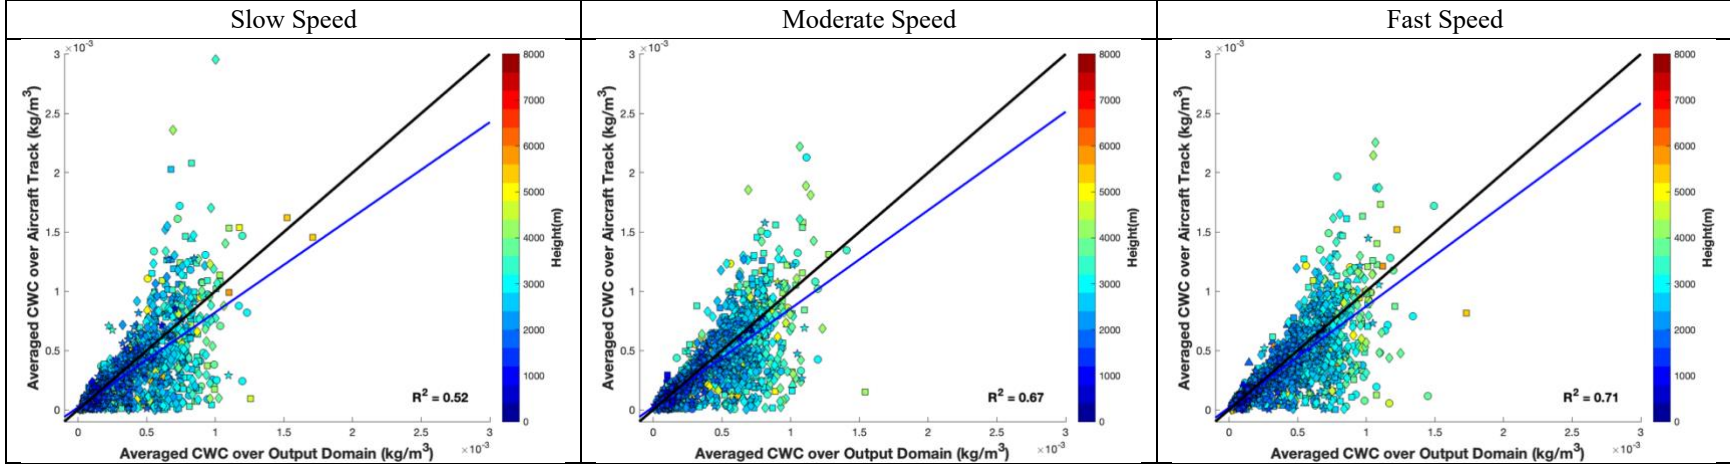

### Horizontal Pattern: Combo

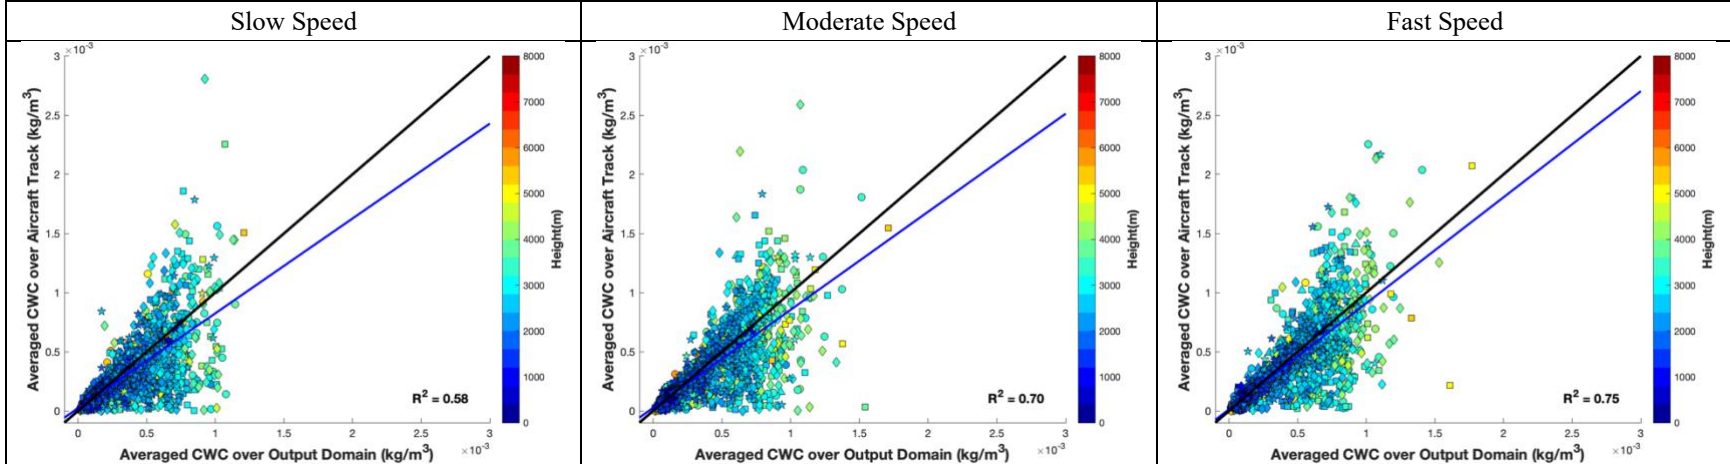

Vertical Profile: Sine wave

Horizontal Pattern: Circle

Slow Speed

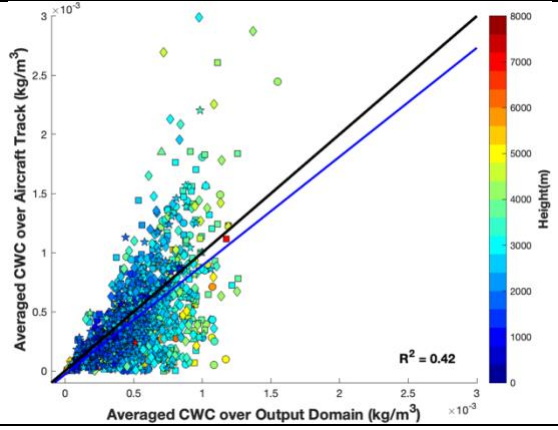

Moderate Speed

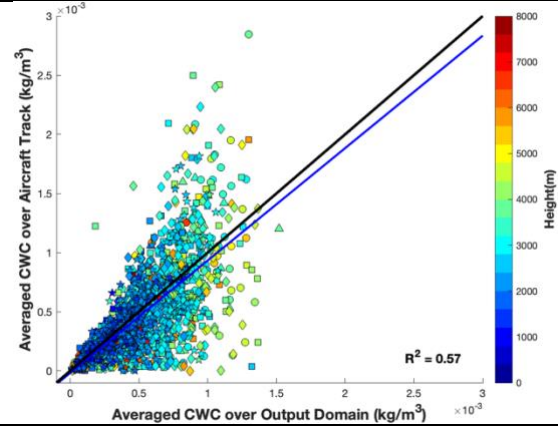

Fast Speed

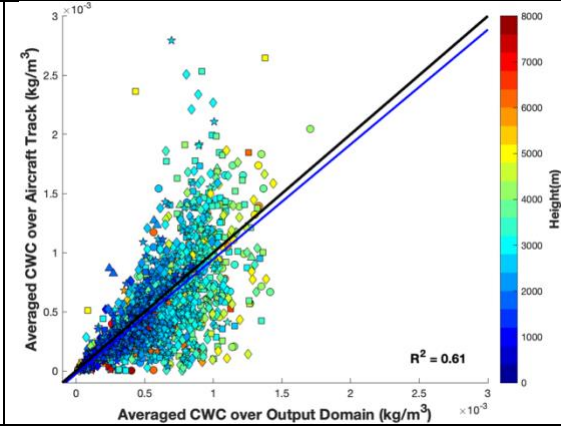

Horizontal Pattern: Diagonal

Slow Speed

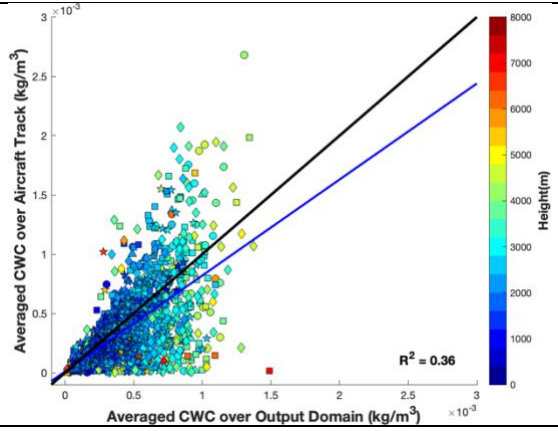

Moderate Speed

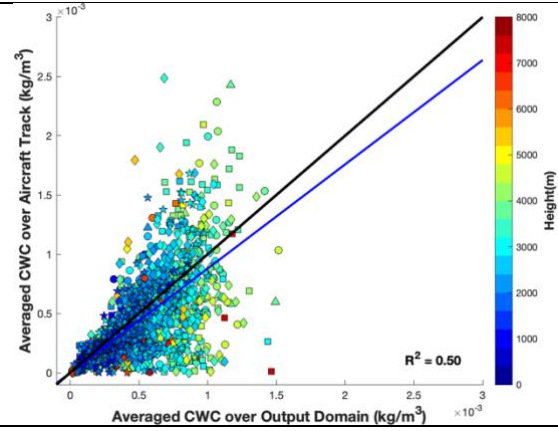

Fast Speed

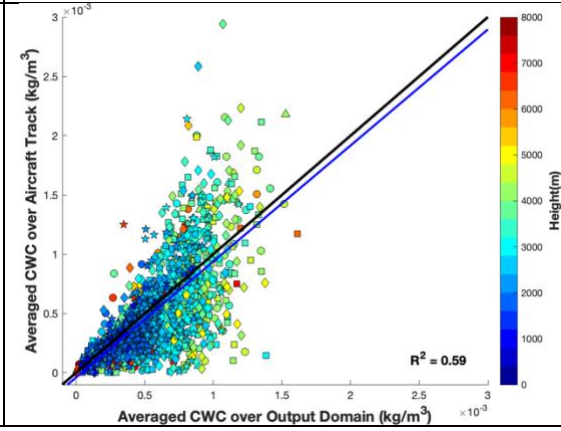

### Horizontal Pattern: Straight

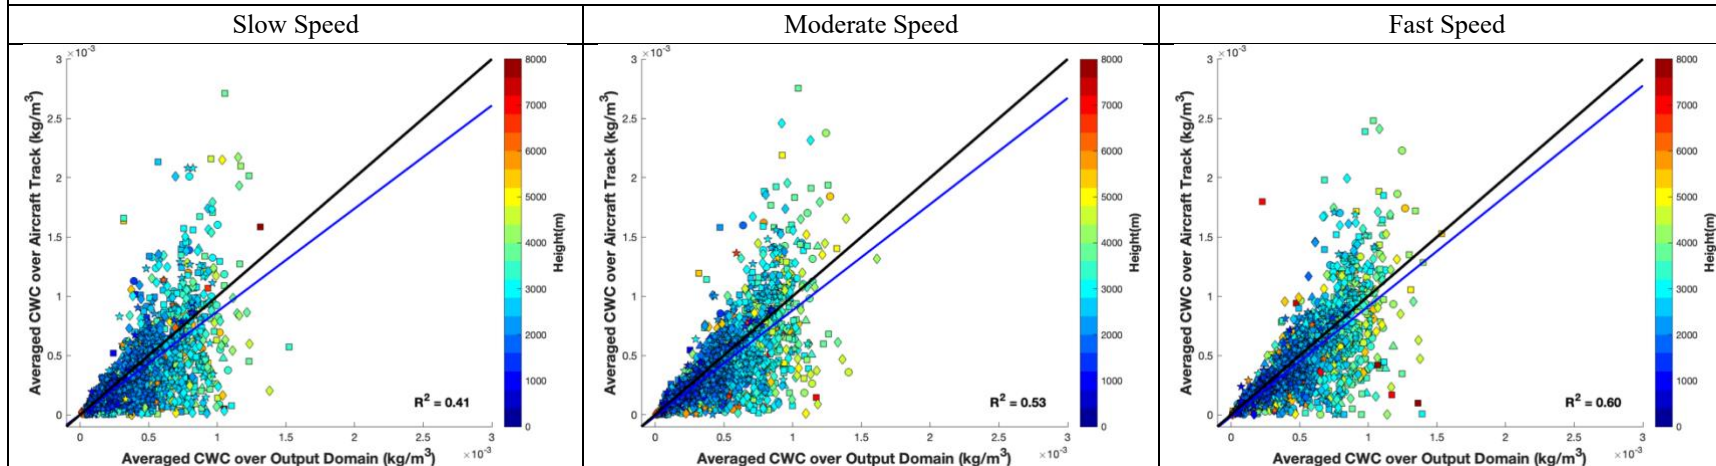

### Horizontal Pattern: Combo

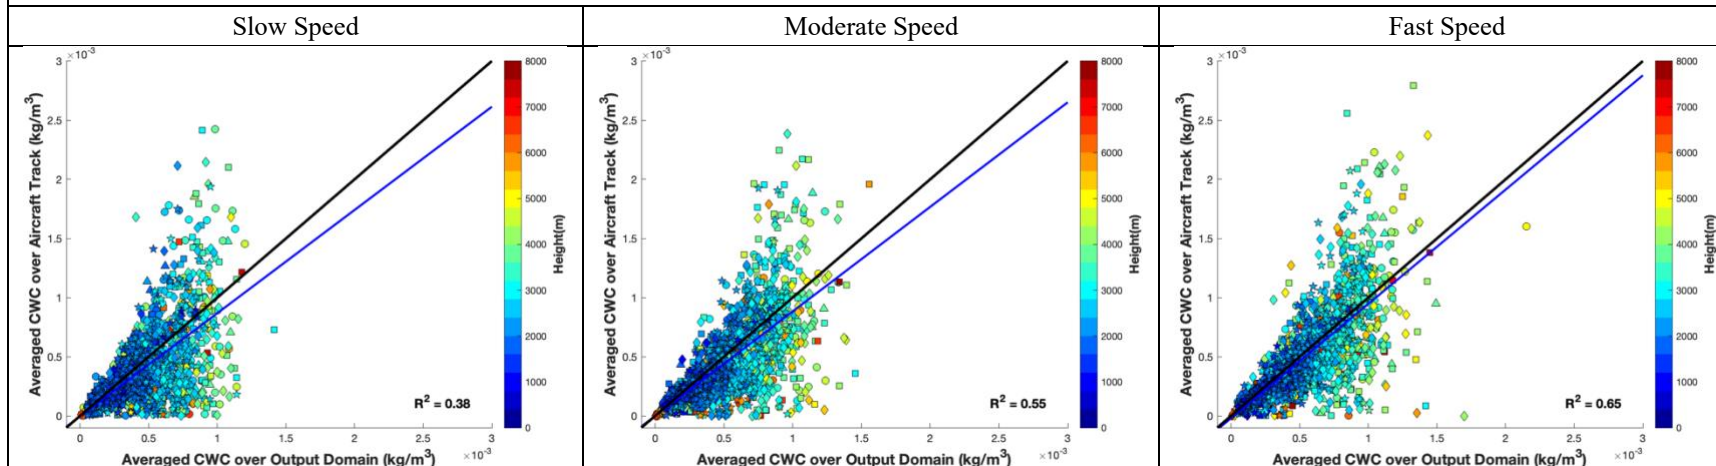

Vertical Profile: Staircase

Horizontal Pattern: Circle

Slow Speed

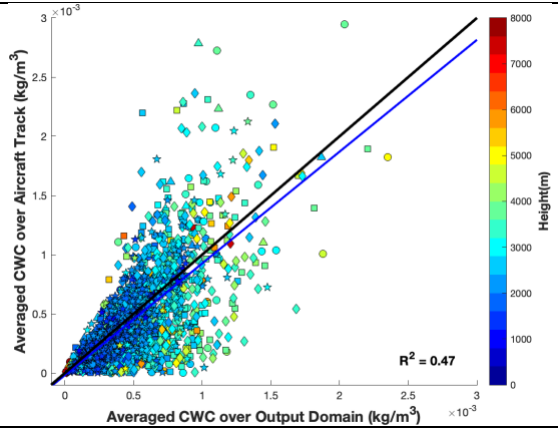

Moderate Speed

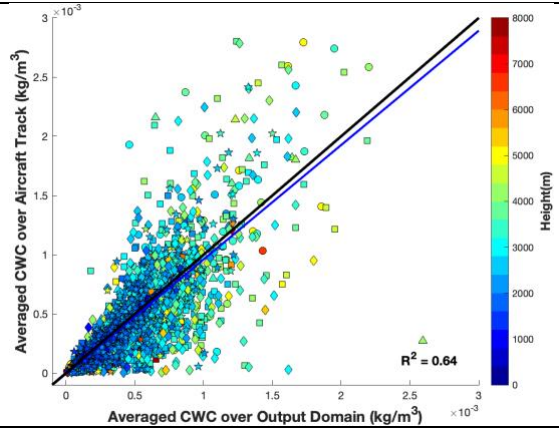

Fast Speed

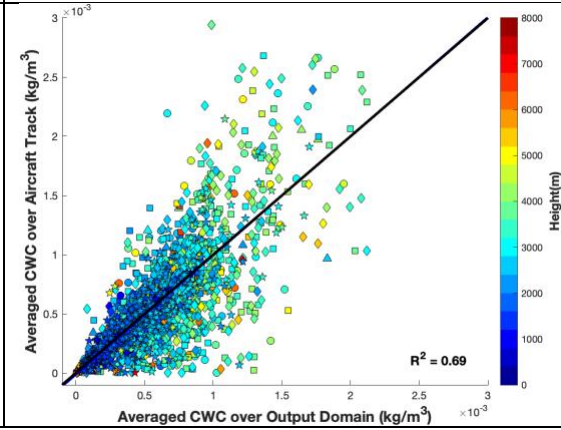

Horizontal Pattern: Diagonal

Slow Speed

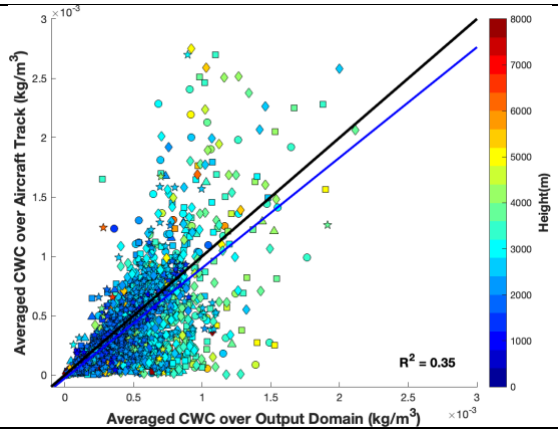

Moderate Speed

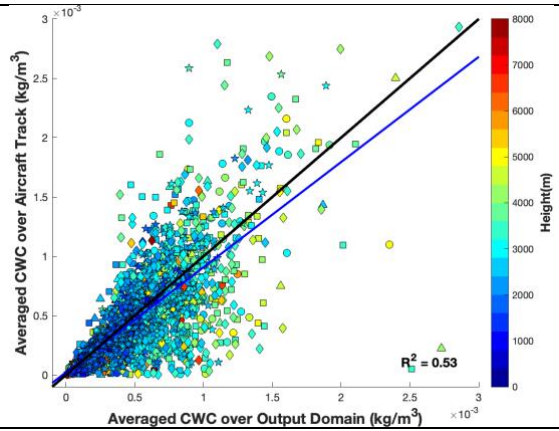

Fast Speed

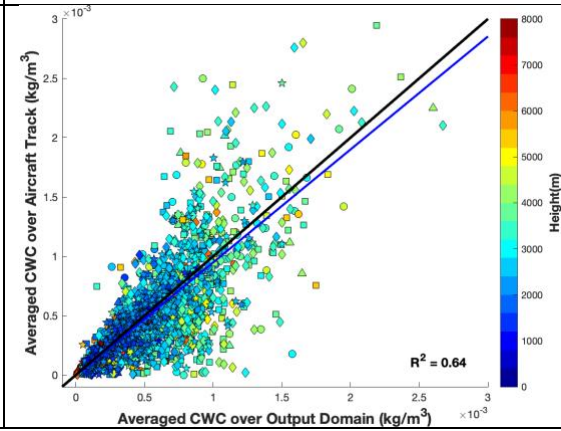

### Horizontal Pattern: Straight

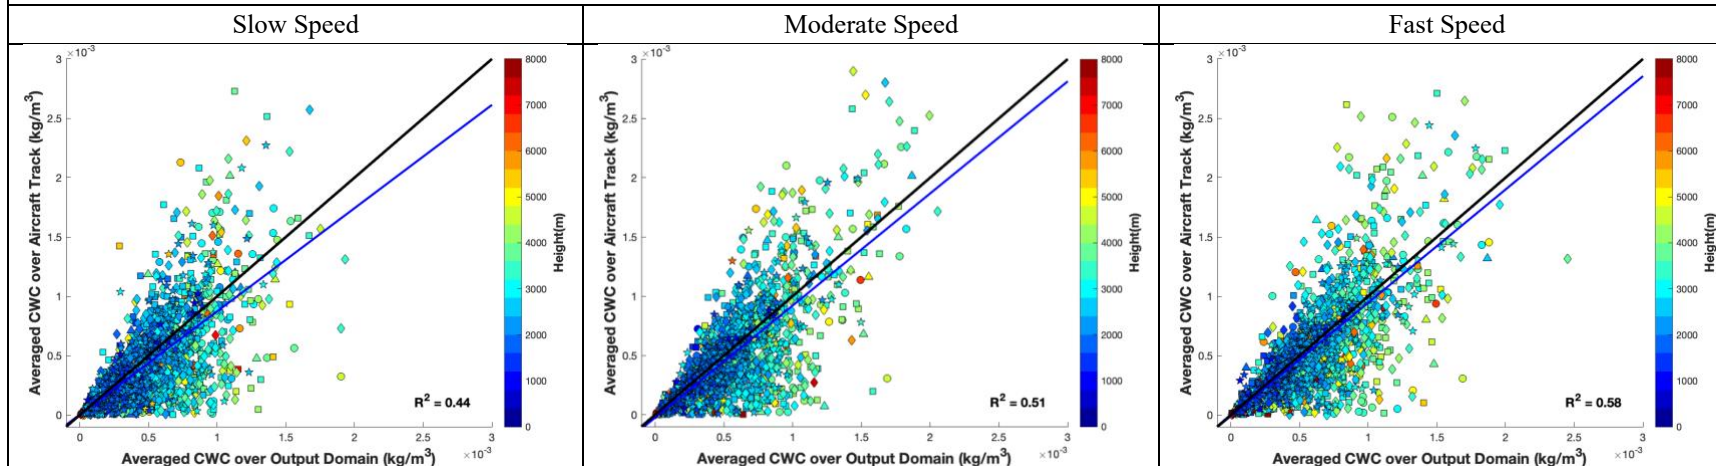

### Horizontal Pattern: Combo

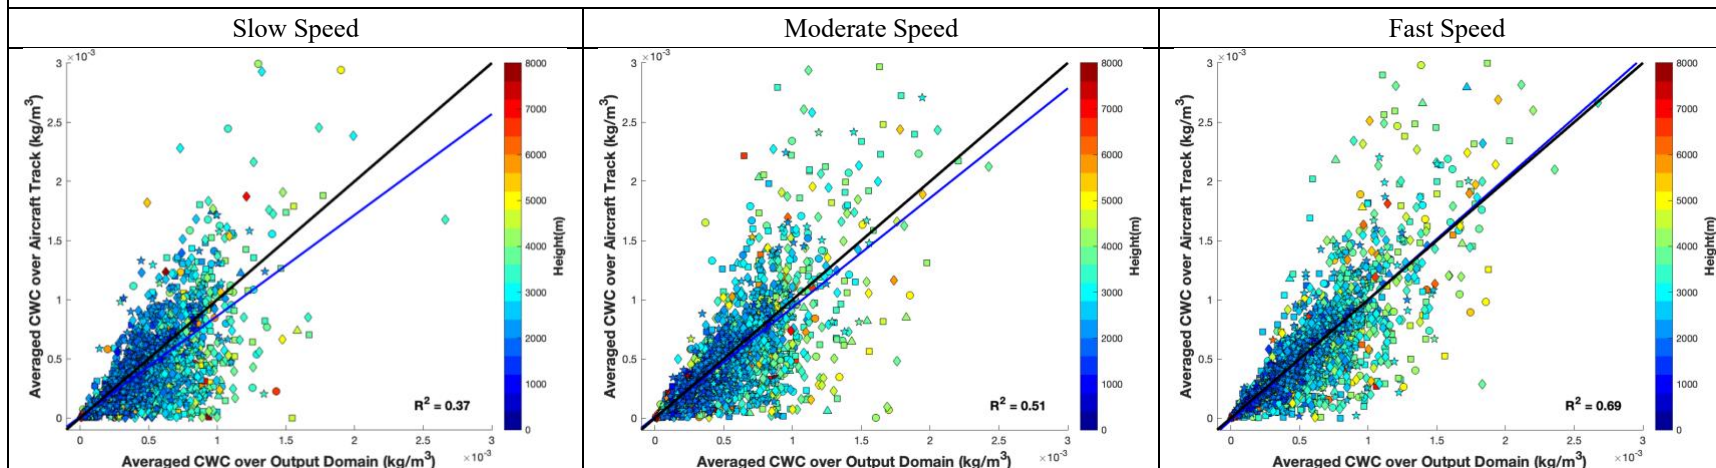

### Sampling Strategy: Zigzag

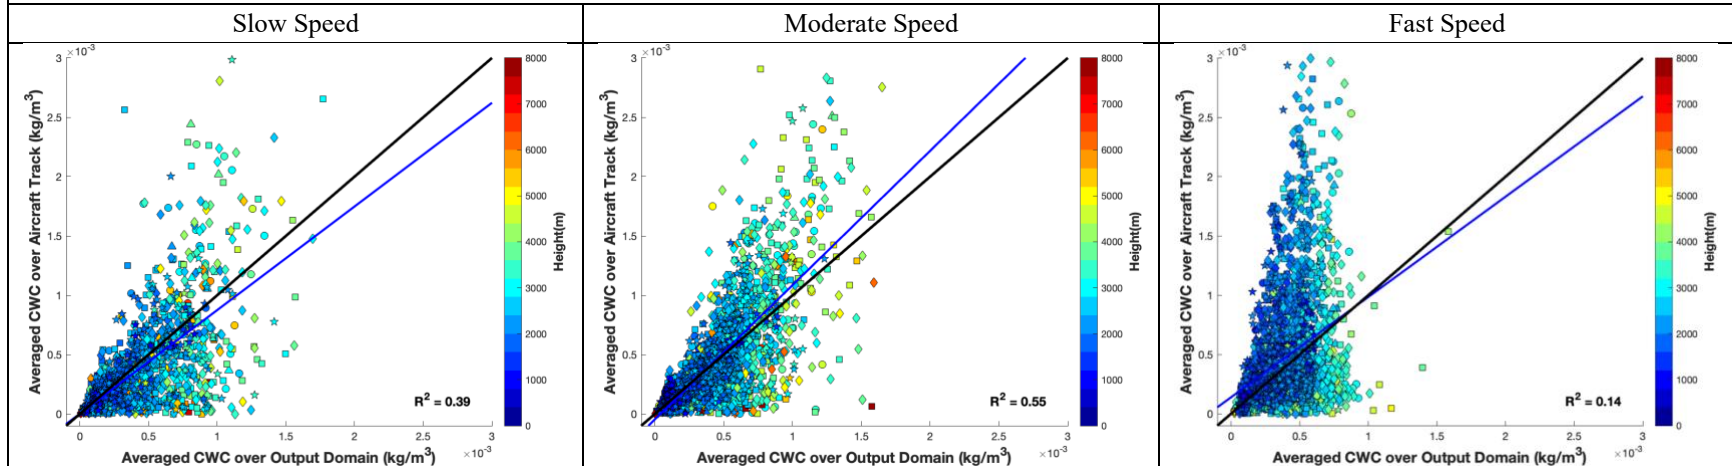

**Figure S2.** Scatter plots comparing aircraft-sampled and domain-averaged CWC for cases grouped by cloud fraction (CF) categories. The x-axis shows domain-mean CWC over the vertical layers intersected by the aircraft trajectory, and the y-axis shows trajectory-averaged CWC. Colors and symbols indicate different horizontal sampling patterns, and the black line denotes the 1:1 reference line. The zigzag pattern is plotted together for comparison but represents an independent trajectory type rather than the horizontal-vertical combination. The plotting method follows that used in Fig. S1.

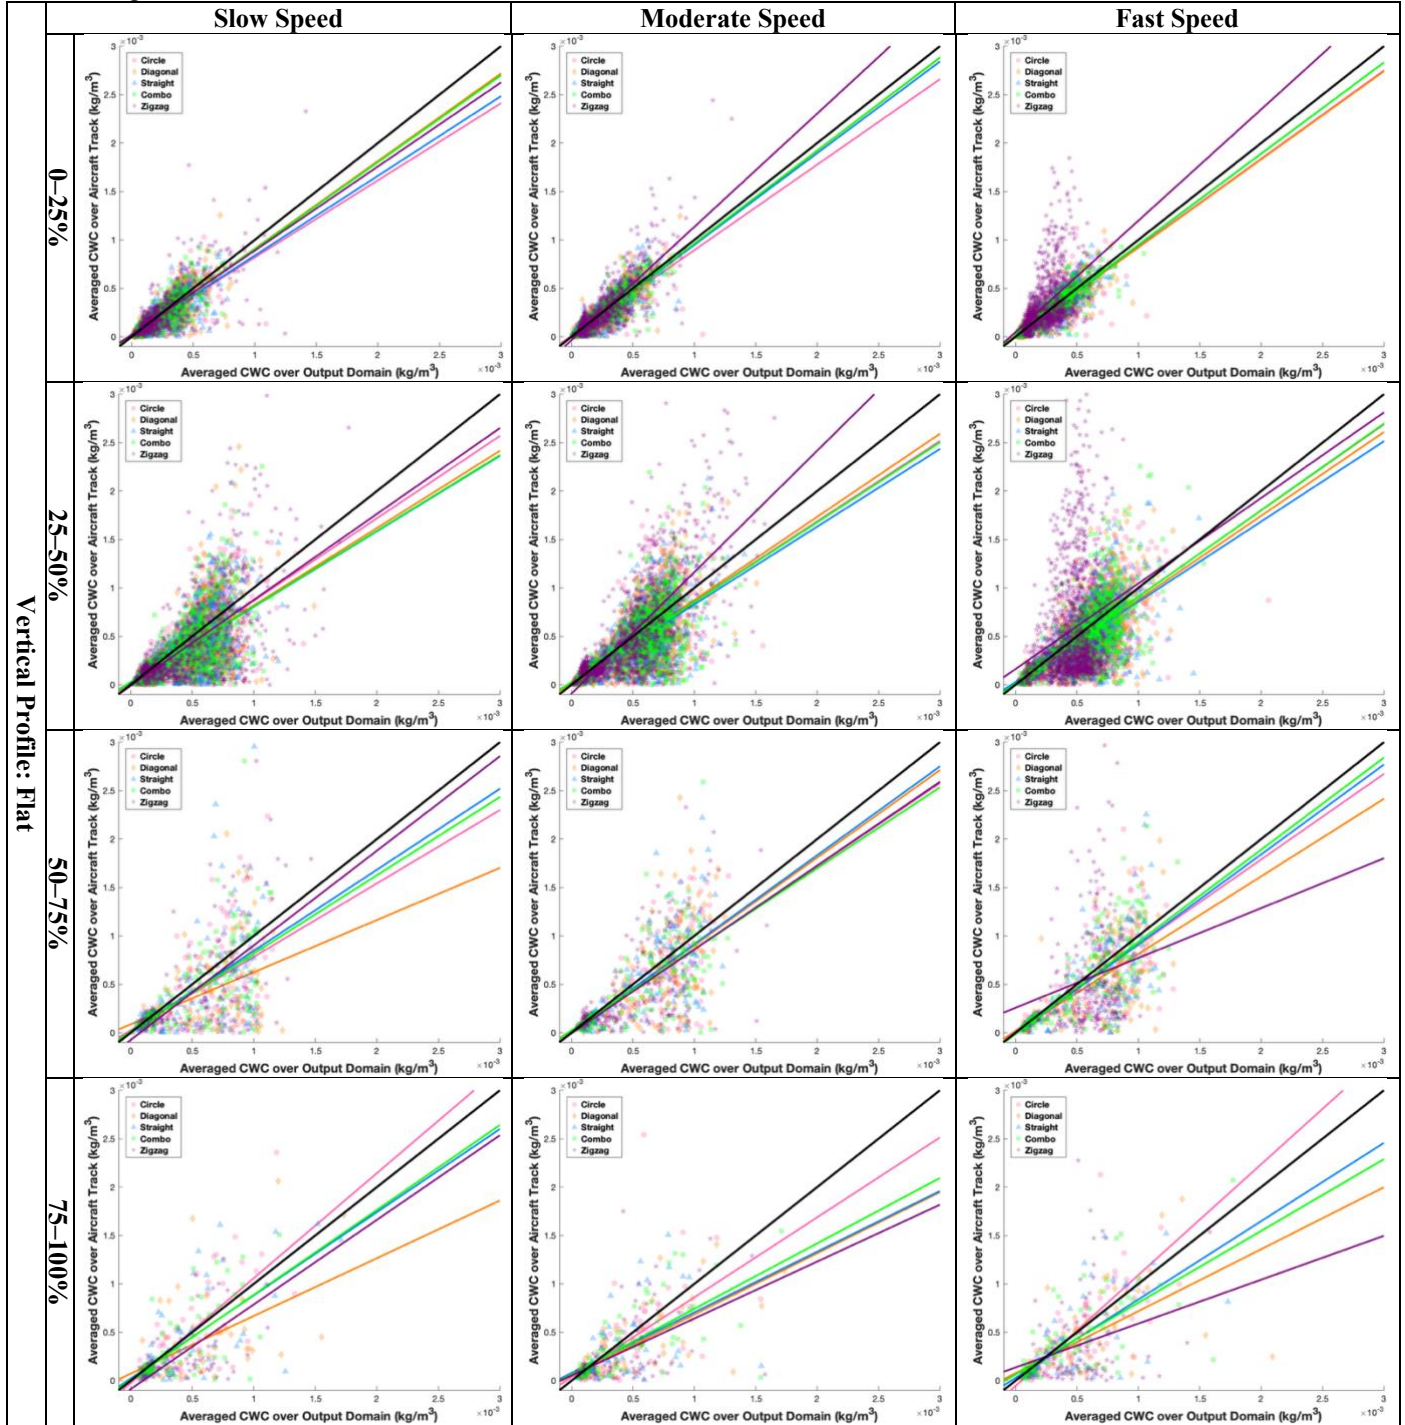

Vertical Profile: Sine wave

0-25%

25-50%

50-75%

75-100%

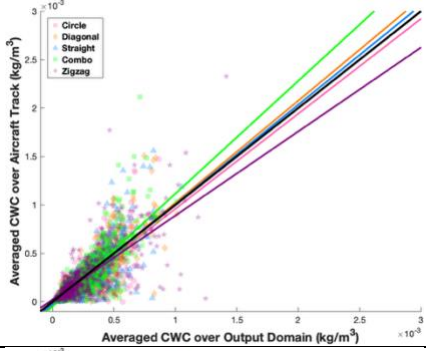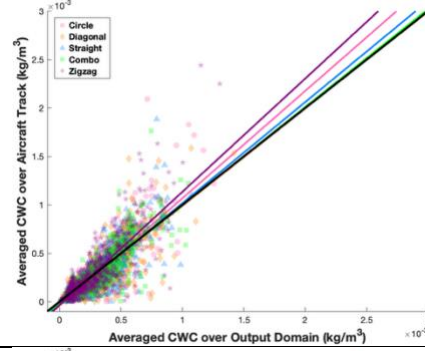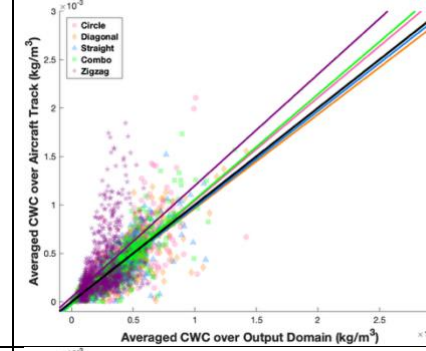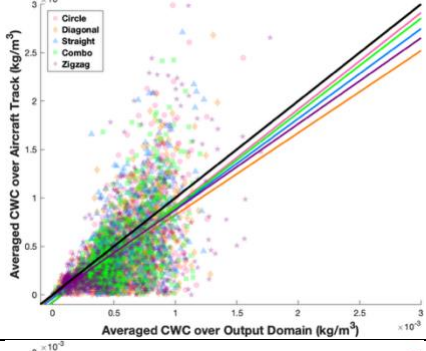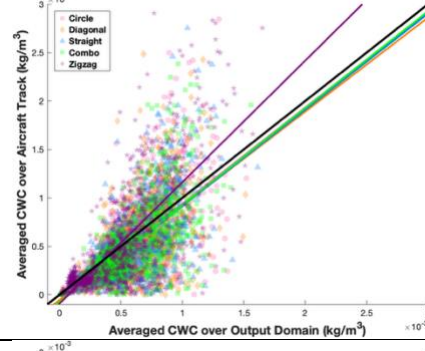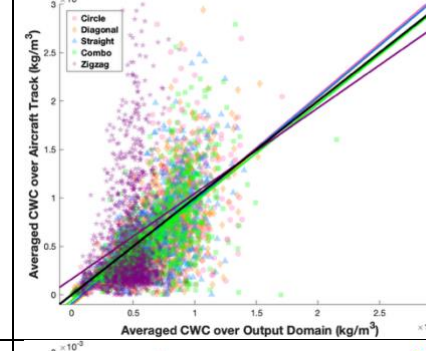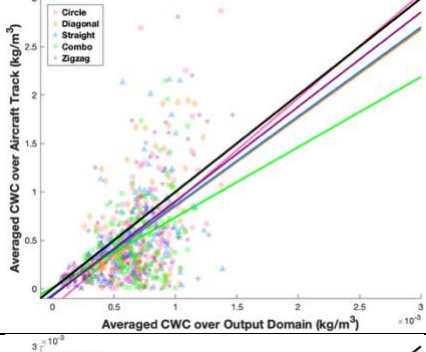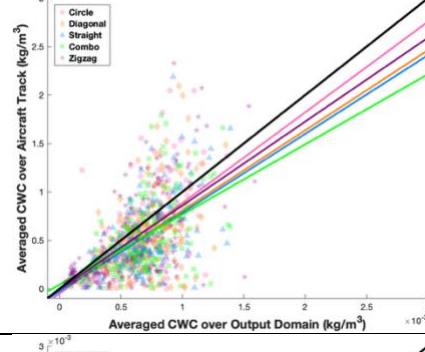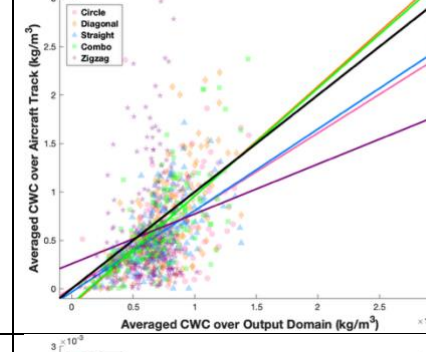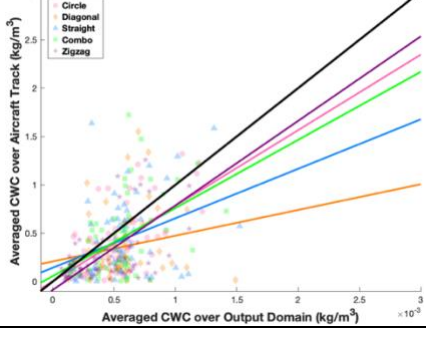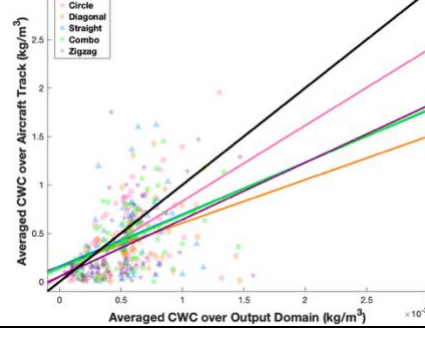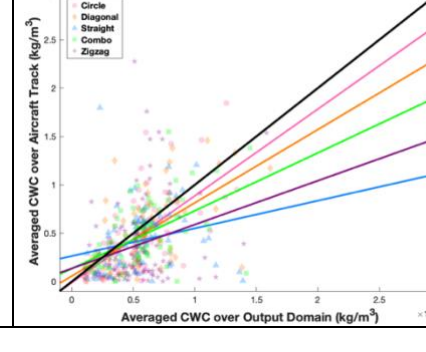

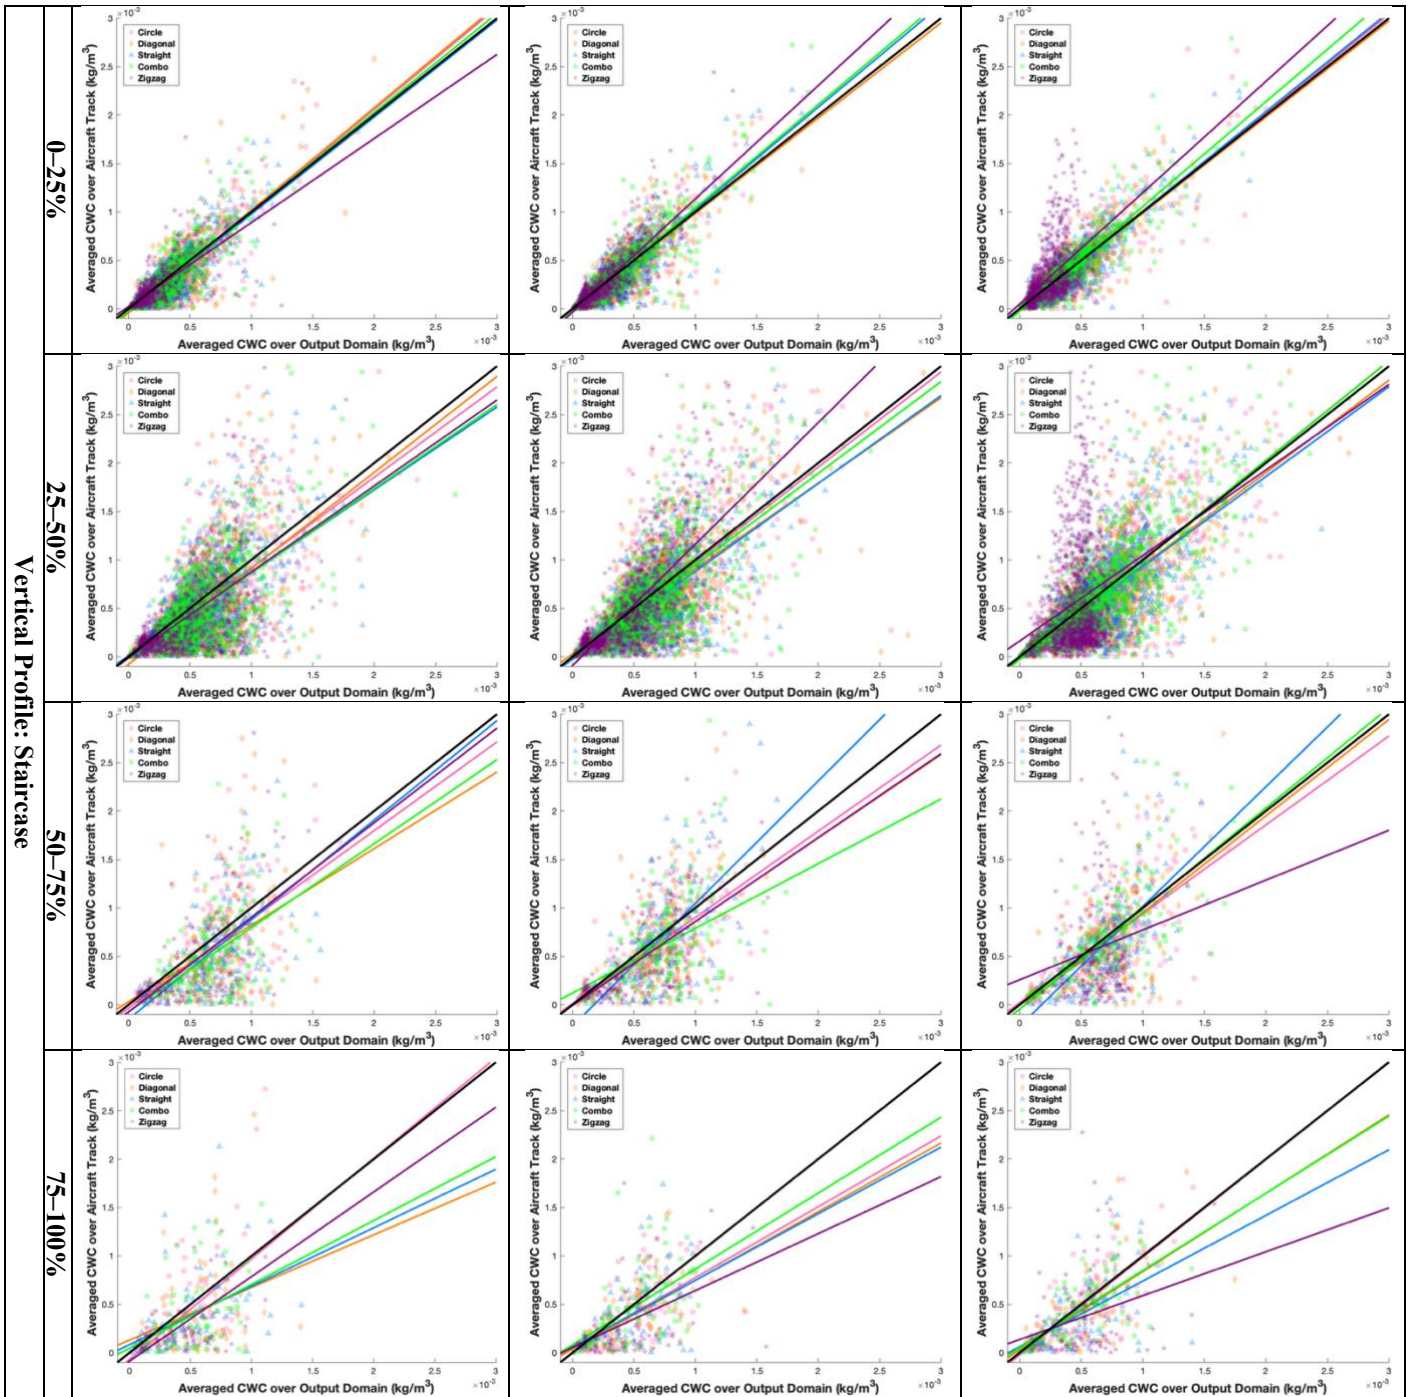

**Table S1.** Summary statistics of simulated cloud-base and cloud-top heights for all analyzed LASSO cases.

| Date     | Cloud Base |         |         |        | Cloud Top |         |         |         |
|----------|------------|---------|---------|--------|-----------|---------|---------|---------|
|          | Min        | Max     | Mean    | STD    | Min       | Max     | Mean    | STD     |
| 20150606 | 1698.21    | 2167.86 | 1996.90 | 148.75 | 1972.36   | 7541.67 | 2682.00 | 1530.43 |
| 20150609 | 2034.38    | 2441.74 | 2292.46 | 106.63 | 2441.74   | 5064.68 | 4148.28 | 634.49  |
| 20150627 | 1873.71    | 2217.42 | 2108.62 | 94.28  | 2145.53   | 2849.50 | 2595.47 | 210.96  |
| 20150801 | 1000.87    | 3977.13 | 1230.67 | 487.68 | 1158.20   | 5347.84 | 4199.13 | 1057.31 |
| 20150829 | 876.91     | 1421.27 | 1258.67 | 172.77 | 1931.69   | 2653.03 | 2305.08 | 169.72  |
| 20160518 | 937.69     | 1647.33 | 1354.10 | 236.57 | 1450.45   | 2599.41 | 2296.27 | 287.28  |
| 20160530 | 1032.03    | 1375.44 | 1175.79 | 110.54 | 5535.42   | 8944.48 | 7070.01 | 1071.53 |
| 20160610 | 1677.42    | 2479.79 | 2236.73 | 223.35 | 2571.03   | 5682.86 | 4140.61 | 1264.47 |
| 20160611 | 1647.54    | 2088.10 | 1955.26 | 145.33 | 2588.13   | 6058.92 | 4046.85 | 1022.84 |
| 20160614 | 3128.33    | 5232.15 | 4136.59 | 583.55 | 3427.78   | 9110.73 | 6152.88 | 1493.96 |
| 20160619 | 1252.38    | 1906.96 | 1671.27 | 203.20 | 2699.49   | 4000.37 | 3439.44 | 237.80  |
| 20160625 | 1737.08    | 2351.33 | 2156.94 | 187.07 | 2338.42   | 2737.55 | 2503.52 | 85.20   |
| 20160716 | 1532.56    | 2556.94 | 2102.13 | 310.30 | 2678.66   | 6305.39 | 4705.42 | 1119.31 |
| 20160719 | 1736.24    | 2241.04 | 2015.58 | 155.41 | 2435.43   | 4048.08 | 3433.98 | 375.75  |
| 20160720 | 1982.36    | 2452.42 | 2308.26 | 146.86 | 2635.56   | 4052.02 | 3549.74 | 380.95  |
| 20160818 | 911.94     | 1476.76 | 1291.07 | 190.34 | 1736.62   | 2450.42 | 2101.59 | 186.66  |
| 20160819 | 1466.79    | 2054.52 | 1864.99 | 170.25 | 4377.22   | 6217.73 | 5232.77 | 511.97  |
| 20160830 | 971.89     | 1559.37 | 1315.25 | 184.93 | 1620.46   | 5815.24 | 4271.72 | 795.09  |
| 20170403 | 902.99     | 1577.86 | 1334.88 | 210.30 | 1477.28   | 1908.13 | 1693.58 | 108.60  |
| 20170405 | 1380.17    | 1860.65 | 1665.12 | 165.70 | 3410.50   | 5181.89 | 4318.52 | 546.76  |
| 20170509 | 1545.99    | 1982.99 | 1861.03 | 137.25 | 2043.73   | 2819.15 | 2517.13 | 207.50  |
| 20170524 | 1385.20    | 1613.11 | 1504.16 | 76.58  | 1613.11   | 1964.32 | 1809.01 | 95.21   |
| 20170527 | 1695.74    | 2820.03 | 2574.91 | 247.11 | 1875.53   | 6319.00 | 3636.53 | 987.07  |
| 20170605 | 1220.37    | 1755.04 | 1561.56 | 162.15 | 4153.08   | 4955.49 | 4478.91 | 183.22  |
| 20170609 | 1460.40    | 1873.89 | 1725.75 | 128.09 | 2191.06   | 3334.64 | 2719.07 | 312.74  |
| 20170614 | 1520.60    | 2852.35 | 2332.27 | 421.86 | 2607.15   | 6686.39 | 5295.94 | 881.68  |
| 20170626 | 1790.00    | 2350.17 | 2181.72 | 164.03 | 4349.36   | 5217.63 | 4836.96 | 214.23  |
| 20170627 | 1314.62    | 2427.92 | 1928.99 | 340.95 | 5295.17   | 7271.10 | 6175.01 | 549.28  |
| 20170629 | 1498.92    | 2145.45 | 1998.51 | 175.40 | 1529.27   | 2205.05 | 2032.59 | 178.49  |
| 20170630 | 693.46     | 3040.37 | 1351.29 | 579.68 | 6061.14   | 9826.15 | 8358.77 | 1041.97 |
| 20170704 | 1122.49    | 1500.40 | 1339.95 | 124.57 | 1675.77   | 5947.67 | 2909.96 | 1839.30 |
| 20170705 | 1064.90    | 1836.68 | 1574.75 | 233.01 | 2776.05   | 3428.09 | 3068.90 | 180.51  |
| 20170709 | 1743.27    | 2053.71 | 1956.38 | 99.59  | 1834.27   | 2386.78 | 2132.33 | 165.78  |
| 20170712 | 2030.07    | 2217.20 | 2177.23 | 50.79  | 2060.34   | 3364.40 | 2904.24 | 387.11  |
| 20170716 | 1403.21    | 2207.30 | 1940.81 | 253.70 | 3239.04   | 4601.80 | 3878.25 | 334.20  |
| 20170717 | 1738.67    | 2486.55 | 2236.79 | 228.13 | 2760.90   | 4216.43 | 3592.42 | 411.62  |

|          |         |         |         |         |         |          |         |         |
|----------|---------|---------|---------|---------|---------|----------|---------|---------|
| 20170719 | 1857.81 | 2384.82 | 2200.52 | 157.86  | 2192.54 | 2922.24  | 2574.05 | 167.51  |
| 20170720 | 2189.78 | 2836.07 | 2617.93 | 200.78  | 2311.24 | 4552.33  | 4006.60 | 584.99  |
| 20170721 | 2248.42 | 2836.22 | 2615.99 | 190.88  | 3140.34 | 5275.07  | 4512.37 | 438.04  |
| 20170725 | 1740.02 | 2364.24 | 2157.40 | 198.95  | 2408.61 | 3545.76  | 3338.28 | 211.42  |
| 20170728 | 1125.14 | 1619.29 | 1436.77 | 138.68  | 3245.76 | 6404.76  | 5005.15 | 796.56  |
| 20170802 | 1432.54 | 2152.76 | 1873.44 | 226.91  | 3364.69 | 4442.11  | 3921.73 | 288.43  |
| 20170826 | 908.25  | 1438.59 | 1245.29 | 169.29  | 3885.86 | 4683.39  | 4325.56 | 176.24  |
| 20170828 | 1630.68 | 2204.59 | 1996.78 | 171.79  | 2204.38 | 2715.24  | 2500.80 | 138.25  |
| 20170830 | 1364.88 | 1711.38 | 1592.47 | 108.77  | 1758.72 | 1889.09  | 1829.71 | 34.54   |
| 20170922 | 1339.72 | 1922.16 | 1674.70 | 177.33  | 1914.83 | 2246.71  | 2056.96 | 76.96   |
| 20170923 | 1639.88 | 2229.34 | 2012.29 | 184.48  | 2186.08 | 3970.38  | 3285.41 | 565.30  |
| 20170924 | 1306.28 | 1924.80 | 1682.43 | 192.84  | 3612.25 | 5350.43  | 4331.93 | 413.99  |
| 20180514 | 1493.94 | 5722.27 | 3531.87 | 1953.67 | 1796.25 | 5860.74  | 3695.51 | 1919.08 |
| 20180522 | 1523.58 | 2232.98 | 1936.20 | 225.50  | 2398.93 | 5464.06  | 4166.72 | 782.21  |
| 20180523 | 1674.37 | 2202.55 | 2009.86 | 169.36  | 4509.34 | 6307.57  | 5421.87 | 458.50  |
| 20180529 | 3492.96 | 4091.09 | 3724.04 | 208.19  | 4900.03 | 6399.02  | 5996.42 | 293.73  |
| 20180530 | 1798.95 | 5325.14 | 2141.11 | 674.50  | 1830.13 | 8095.82  | 5359.67 | 2134.33 |
| 20180531 | 2115.10 | 2357.94 | 2213.03 | 78.82   | 2174.32 | 2598.66  | 2444.22 | 132.69  |
| 20180606 | 1652.59 | 2664.91 | 2258.59 | 320.24  | 2677.39 | 5632.53  | 4255.99 | 824.44  |
| 20180618 | 1312.55 | 1904.42 | 1730.74 | 166.56  | 2348.77 | 5019.75  | 3680.21 | 550.31  |
| 20180619 | 1488.99 | 2202.19 | 1916.57 | 222.86  | 2158.04 | 5743.94  | 2624.21 | 774.38  |
| 20180704 | 1372.29 | 1901.91 | 1649.02 | 174.18  | 1555.26 | 2413.48  | 2155.37 | 258.54  |
| 20180705 | 1370.89 | 1966.08 | 1748.86 | 193.40  | 3456.17 | 4503.49  | 3827.98 | 233.43  |
| 20180707 | 1402.16 | 2234.52 | 1856.64 | 259.60  | 3641.07 | 5631.86  | 4859.72 | 533.12  |
| 20180709 | 1674.16 | 1963.02 | 1872.59 | 88.69   | 2917.75 | 3929.23  | 3480.77 | 283.75  |
| 20180710 | 1432.33 | 1905.70 | 1735.04 | 134.79  | 4532.15 | 9225.38  | 6826.71 | 1347.59 |
| 20180711 | 1860.33 | 2336.56 | 2161.35 | 136.59  | 4740.13 | 10021.99 | 6861.75 | 1356.44 |
| 20180712 | 1861.89 | 2305.79 | 2153.49 | 141.76  | 5245.07 | 7944.14  | 6571.86 | 623.70  |
| 20180731 | 1452.49 | 1825.41 | 1732.32 | 108.05  | 3509.46 | 4757.98  | 4186.44 | 270.00  |
| 20180811 | 1519.53 | 2165.16 | 1949.73 | 230.28  | 1641.22 | 6302.48  | 4295.75 | 1063.56 |
| 20180901 | 1945.78 | 2315.44 | 2174.83 | 91.72   | 1975.94 | 2434.08  | 2242.09 | 108.73  |
| 20180911 | 940.22  | 1682.65 | 1384.32 | 223.87  | 2365.25 | 2856.30  | 2575.48 | 107.11  |
| 20180914 | 1248.70 | 1534.22 | 1446.83 | 88.00   | 3041.22 | 4380.54  | 3563.86 | 315.54  |
| 20180916 | 1424.97 | 1830.37 | 1668.78 | 119.85  | 2064.65 | 6632.68  | 5171.03 | 1326.92 |
| 20180917 | 1366.03 | 1740.05 | 1602.70 | 115.84  | 1739.86 | 4557.33  | 3422.99 | 653.30  |
| 20180918 | 1580.61 | 1894.40 | 1797.62 | 99.63   | 3102.13 | 5206.06  | 3887.77 | 336.37  |
| 20181001 | 1128.53 | 1929.75 | 1668.20 | 247.65  | 2807.65 | 3252.44  | 2989.80 | 101.96  |
| 20181002 | 1340.05 | 1991.63 | 1750.90 | 190.38  | 2657.96 | 8096.90  | 6249.16 | 2154.03 |
| 20190404 | 320.24  | 749.06  | 537.96  | 158.93  | 1137.19 | 1476.66  | 1372.08 | 89.88   |

|          |         |         |         |        |         |         |         |         |
|----------|---------|---------|---------|--------|---------|---------|---------|---------|
| 20190506 | 171.02  | 1505.87 | 586.82  | 288.68 | 3722.26 | 9132.60 | 7146.70 | 1659.39 |
| 20190512 | 2200.73 | 2577.16 | 2406.02 | 94.79  | 2349.31 | 3410.76 | 3184.68 | 234.63  |
| 20190517 | 1274.41 | 1340.44 | 1303.15 | 15.61  | 1792.31 | 2037.21 | 1900.57 | 78.19   |
| 20190607 | 1303.60 | 1677.39 | 1545.54 | 113.86 | 1849.21 | 2917.39 | 2490.27 | 294.28  |
| 20190612 | 1535.15 | 2053.69 | 1889.08 | 145.87 | 2498.77 | 3044.93 | 2822.73 | 135.66  |
| 20190617 | 1124.85 | 1471.43 | 1353.94 | 112.09 | 2021.57 | 2529.33 | 2277.24 | 129.98  |
| 20190626 | 1190.92 | 1834.92 | 1599.60 | 195.59 | 1864.68 | 2946.02 | 2166.06 | 345.94  |
| 20190701 | 1427.79 | 1710.46 | 1624.87 | 82.99  | 2035.07 | 3374.72 | 2684.48 | 319.56  |
| 20190704 | 1125.78 | 1623.47 | 1451.79 | 152.29 | 1187.18 | 2202.81 | 1832.09 | 266.66  |
| 20190707 | 881.22  | 1468.79 | 1271.11 | 180.96 | 2927.57 | 4278.82 | 3750.84 | 272.19  |
| 20190709 | 1250.63 | 1785.45 | 1599.43 | 173.50 | 1433.99 | 4278.89 | 1888.56 | 436.86  |
| 20190714 | 1124.77 | 1680.03 | 1492.54 | 175.16 | 2468.92 | 3216.39 | 3000.93 | 147.69  |
| 20190804 | 1032.05 | 1407.35 | 1285.64 | 120.33 | 2960.20 | 3982.16 | 3710.95 | 225.89  |
| 20190805 | 1402.57 | 1897.13 | 1723.28 | 160.53 | 1897.04 | 3375.29 | 2938.35 | 287.02  |
| 20190901 | 727.37  | 1102.78 | 982.23  | 115.45 | 850.10  | 2447.29 | 1783.50 | 523.23  |
| 20190929 | 817.74  | 1161.67 | 1040.94 | 113.13 | 1466.24 | 6417.79 | 3631.91 | 1613.68 |
